# Supplementary material
Source: PubMed Central journal article supplement (PMC3234849)
Supplement: supp_M111.297358_jbc.M111.297358-1.pdf [file supp_M111.297358_jbc.M111.297358-1.pdf]

## **Supplementary Information**

**Supplementary Table 1.** Expression of IMD/ADM2 transcripts in human and mouse EST libraries with a germ-cell origin.

**Supplementary Fig. 1.** List of microarray studies probing oocyte transcripts in the GEO Profile database.

**Supplementary Fig. 2.** Video recording of COC culture in the control (A), IMD/ADM2 (100 ng/ml) (B), and FSH (1 ng/ml) (C) groups. The time-lapsed recordings were taken over a 13-hr period starting at 20 hr after culture. These videos are related to main Figure 3A.

**Supplementary Table 1.** Expression of intermedin transcripts in human and mouse EST libraries with a germ cell origin.

| Mouse IMD EST | Tissue Origin                   | Human IMD EST | Tissue Origin    |
|---------------|---------------------------------|---------------|------------------|
| BG918210      | mammary                         | BX400262      | T CELLS          |
| BY733242      | submandibular gland             | BX348456      | T CELLS          |
| BB705319      | <i>in vitro</i> fertilized eggs | AI970452      | lung carcinoma   |
| BY320656      | synovial fibroblasts            | AI638686      | germ cell tumors |
| BY361392      | <i>in vitro</i> fertilized eggs | AI633839      | germ cell tumors |
| AI616110      | mouse two-cell embryo           | AI650897      | germ cell tumors |
| BB701007      | <i>in vitro</i> fertilized eggs |               |                  |
| BB701058      | <i>in vitro</i> fertilized eggs |               |                  |

**Supplementary Fig. 1. List of microarray studies probing oocyte and cumulus cell transcripts in the GEO database.**

1. [GDS2300](#) | [GPL1261](#)

|                  |                                                                                                                                                                                                                                                       |
|------------------|-------------------------------------------------------------------------------------------------------------------------------------------------------------------------------------------------------------------------------------------------------|
| Title:           | Germinal vesicle stage and metaphase II stage oocyte comparison <sup>26</sup>                                                                                                                                                                         |
| GEO dataset link | <a href="http://www.ncbi.nlm.nih.gov/sites/GDSbrowser?acc=GDS2300">http://www.ncbi.nlm.nih.gov/sites/GDSbrowser?acc=GDS2300</a>                                                                                                                       |
| Experiment:      | Comparison of oocytes at the germinal vesicle stage (GV) to those at the metaphase II (MII) stage. GV-stage oocytes are transcriptionally silent. Results show that the destruction of transcripts that occurs during oocyte maturation is selective. |

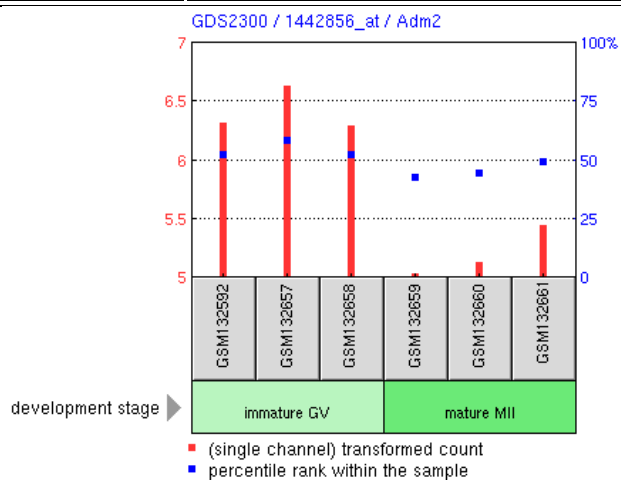

2. [GDS2387](#) | [GPL1261](#)

|                  |                                                                                                                                                                                                                                  |
|------------------|----------------------------------------------------------------------------------------------------------------------------------------------------------------------------------------------------------------------------------|
| Title:           | Oocyte and one-cell embryo polysomal mRNA <sup>27</sup>                                                                                                                                                                          |
| GEO dataset link | <a href="http://www.ncbi.nlm.nih.gov/sites/GDSbrowser?acc=GDS2387">http://www.ncbi.nlm.nih.gov/sites/GDSbrowser?acc=GDS2387</a>                                                                                                  |
| Experiment:      | Analysis of the polysomal maternal mRNA (MmRNA) populations of oocytes and late one-cell stage embryos. Results provide insight into the mechanisms that regulate the stage-specific translation of MmRNAs in early development. |

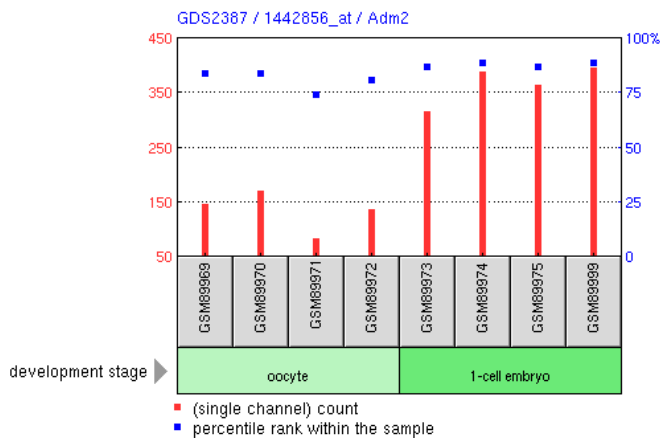

3. [GDS814](#) | [GPL340](#)

|                  |                                                                                                                                                                                                                                                              |
|------------------|--------------------------------------------------------------------------------------------------------------------------------------------------------------------------------------------------------------------------------------------------------------|
| Title:           | Preimplantation embryo development (MOE430B) <sup>28</sup>                                                                                                                                                                                                   |
| GEO dataset link | <a href="http://www.ncbi.nlm.nih.gov/sites/GDSbrowser?acc=GDS814">http://www.ncbi.nlm.nih.gov/sites/GDSbrowser?acc=GDS814</a>                                                                                                                                |
| Experiment:      | Expression profiling of CF-1 x B6D2F1/J preimplantation embryos. Oocytes and embryos at the 1-cell, 2-cell, 8-cell, and blastocyst stages examined. Results provide insight into mechanisms underlying the major transitions in preimplantation development. |

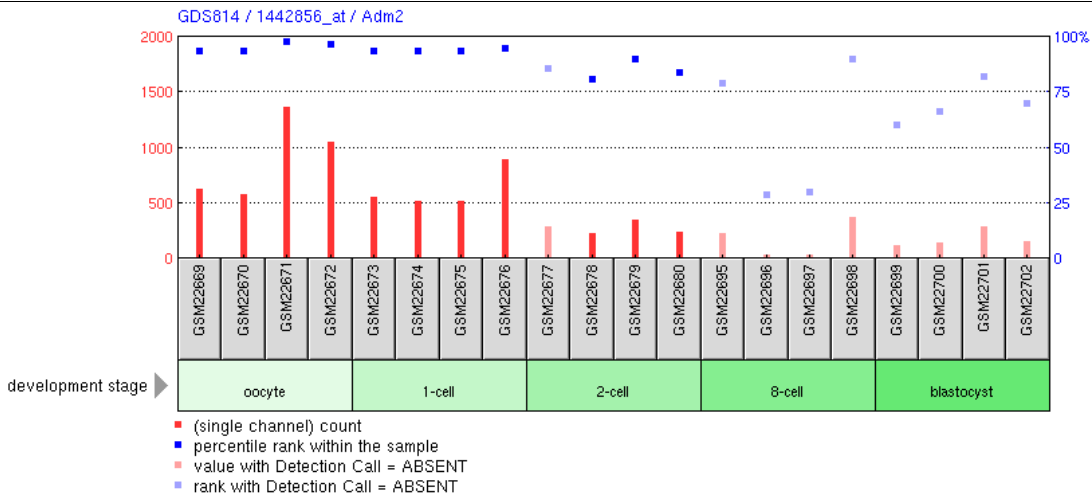

4. [GDS1266](#) | [GPL340](#)

|                  |                                                                                                                                                                                                                                                |
|------------------|------------------------------------------------------------------------------------------------------------------------------------------------------------------------------------------------------------------------------------------------|
| Title:           | Oocyte development (MOE430B) <sup>29</sup>                                                                                                                                                                                                     |
| GEO dataset link | <a href="http://www.ncbi.nlm.nih.gov/sites/GDSbrowser?acc=GDS1266">http://www.ncbi.nlm.nih.gov/sites/GDSbrowser?acc=GDS1266</a>                                                                                                                |
| Experiment:      | Analysis of oocytes from follicles at the primordial to large antral stages of development, collected from B6SJLF1 animals at 2 to 22 days of age. Provides insight into the development of eggs of high meiotic and developmental competence. |

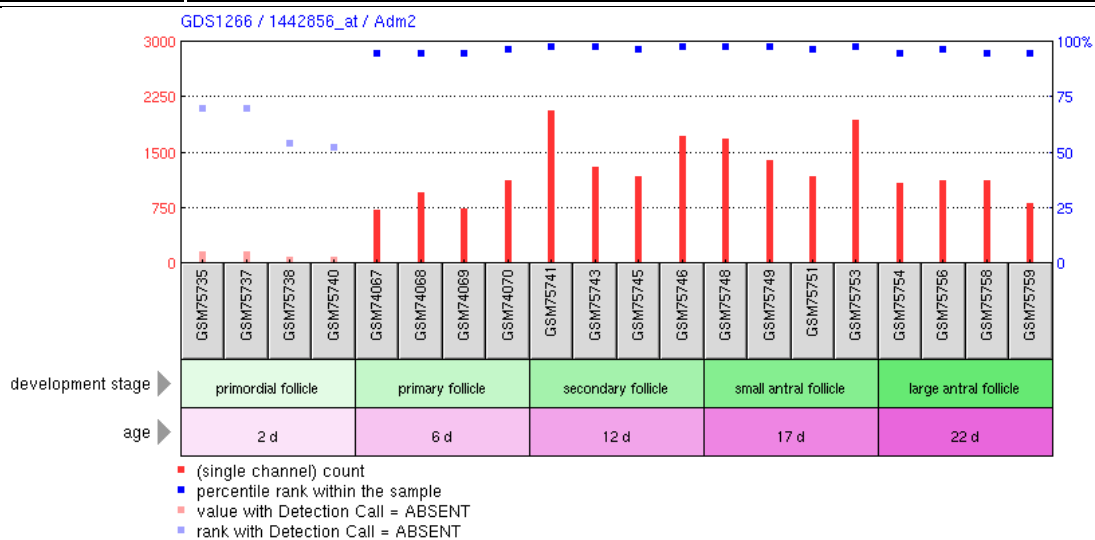

5. [GDS1978](#) | [GPL1261](#)

|                  |                                                                                                                                                                                                                                                                                                  |
|------------------|--------------------------------------------------------------------------------------------------------------------------------------------------------------------------------------------------------------------------------------------------------------------------------------------------|
| Title:           | Zinc-finger protein basoenuclin knockdown effect on oocytes <sup>30</sup>                                                                                                                                                                                                                        |
| GEO dataset link | <a href="http://www.ncbi.nlm.nih.gov/sites/GDSbrowser?acc=GDS1978">http://www.ncbi.nlm.nih.gov/sites/GDSbrowser?acc=GDS1978</a>                                                                                                                                                                  |
| Experiment:      | Analysis of oocytes following RNAi knockdown of basoenuclin (Bnc1), a zinc-finger protein found in abundance in oocytes. The Bnc1 gene qualifies as a maternal-effect gene because the source of pre-implantation embryonic Bnc1 is maternal. Results provide insight into the function of Bnc1. |

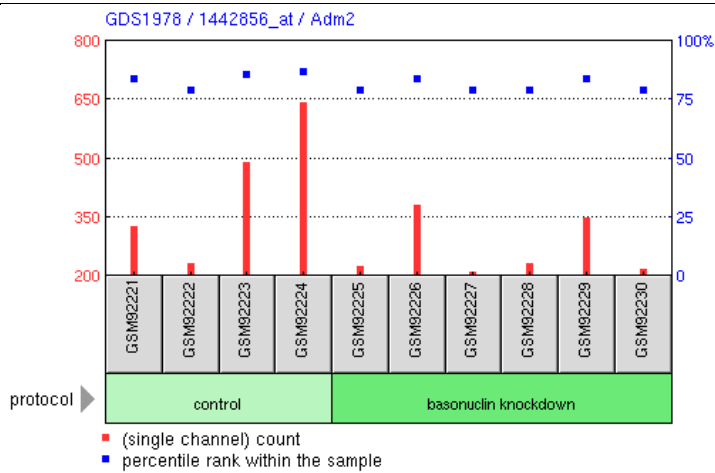

6. [GDS1677](#) | [GPL1261](#)

|                  |                                                                                                                                                                                                                                                                                                       |
|------------------|-------------------------------------------------------------------------------------------------------------------------------------------------------------------------------------------------------------------------------------------------------------------------------------------------------|
| Title:           | Cumulus oocyte complex during ovulation: time course <sup>2</sup>                                                                                                                                                                                                                                     |
| GEO dataset link | <a href="http://www.ncbi.nlm.nih.gov/sites/GDSbrowser?acc=GDS1677">http://www.ncbi.nlm.nih.gov/sites/GDSbrowser?acc=GDS1677</a>                                                                                                                                                                       |
| Experiment:      | Analysis of cumulus oocyte complexes (COCs) isolated from ovaries prior to ovulation or from the oviduct after ovulation. Follicular growth stimulated using equine chorionic gonadotropin (CG) and ovulation induced using human CG. Results identify candidate genes in COCs that impact ovulation. |

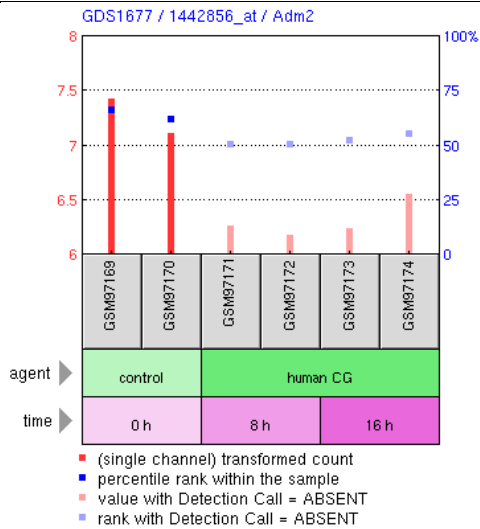



7. [GDS3295](#) | [GPL1261](#)

|                  |                                                                                                                                                                                                                                                                                                         |
|------------------|---------------------------------------------------------------------------------------------------------------------------------------------------------------------------------------------------------------------------------------------------------------------------------------------------------|
| Title:           | Age-associated aneuploidy model                                                                                                                                                                                                                                                                         |
| GEO dataset link | <a href="http://www.ncbi.nlm.nih.gov/sites/GDSbrowser?acc=GDS3295">http://www.ncbi.nlm.nih.gov/sites/GDSbrowser?acc=GDS3295</a>                                                                                                                                                                         |
| Experiment:      | Analysis of germinal vesicle (GV)-intact oocytes and metaphase II (MII) eggs obtained from young and old females. An increased incidence of aneuploidy is observed with increasing maternal age. Results provide insight into the molecular basis underlying the age-associated increase in aneuploidy. |

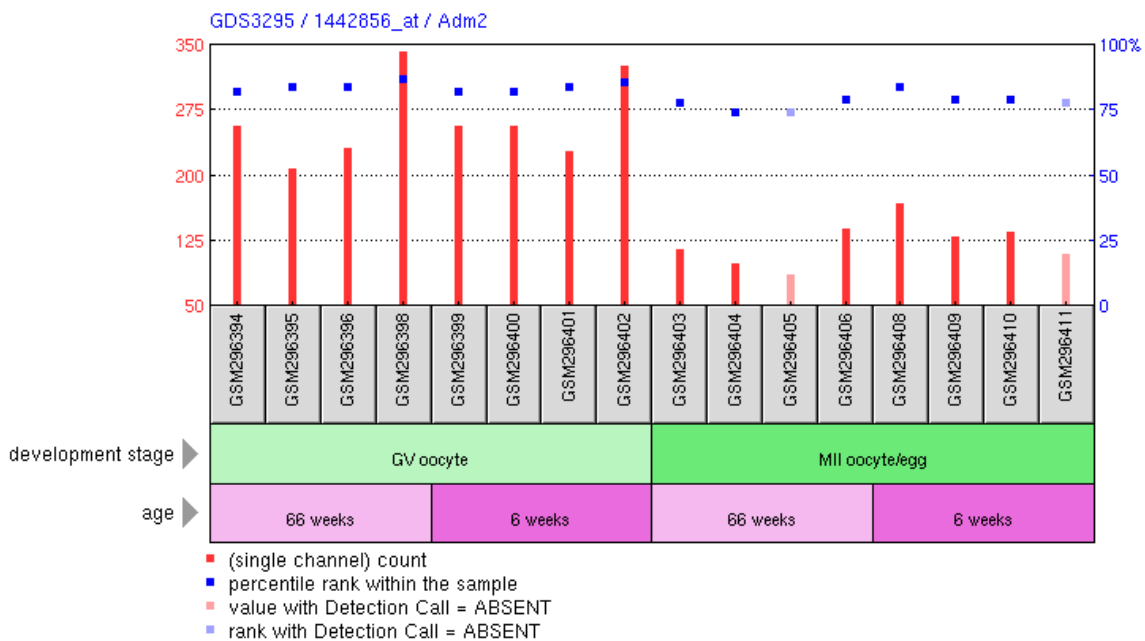

8. [GDS3294](#) | [GPL1261](#)

|                  |                                                                                                                                                                                                                                                                               |
|------------------|-------------------------------------------------------------------------------------------------------------------------------------------------------------------------------------------------------------------------------------------------------------------------------|
| Title:           | CTCF depletion effect in oocytes                                                                                                                                                                                                                                              |
| GEO dataset link | <a href="http://www.ncbi.nlm.nih.gov/sites/GDSbrowser?acc=GDS3294">http://www.ncbi.nlm.nih.gov/sites/GDSbrowser?acc=GDS3294</a>                                                                                                                                               |
| Experiment:      | Analysis of germinal vesicle (GV) oocytes depleted for maternal stores of CTCF by RNA interference (RNAi). Depletion of CTCF, an 11 zinc-finger DNA-binding protein, causes meiotic defects in the egg. Results provide insight into the molecular basis of this observation. |

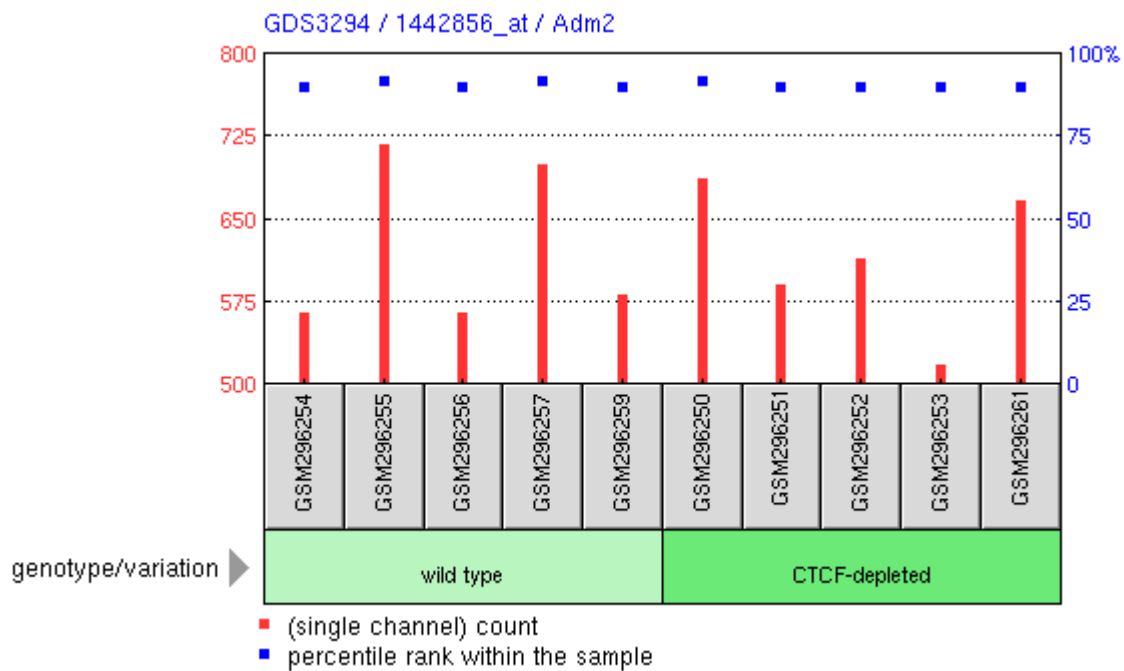

9. [GDS3256](#) | [GPL570](#)

|                  |                                                                                                                                                                                                                                                                                                          |
|------------------|----------------------------------------------------------------------------------------------------------------------------------------------------------------------------------------------------------------------------------------------------------------------------------------------------------|
| Title:           | Metaphase II stage oocytes matured <i>in vivo</i>                                                                                                                                                                                                                                                        |
| GEO dataset link | <a href="http://www.ncbi.nlm.nih.gov/sites/GDSbrowser?acc=GDS3256">http://www.ncbi.nlm.nih.gov/sites/GDSbrowser?acc=GDS3256</a>                                                                                                                                                                          |
| Experiment:      | Analysis of young, untreated metaphase II (MII) oocytes. Results provide insight into the baseline of genes expressed in <i>in vivo</i> matured oocytes and into the molecular mechanisms underlying biological processes such as oogenesis, folliculogenesis, fertilization, and embryonic development. |

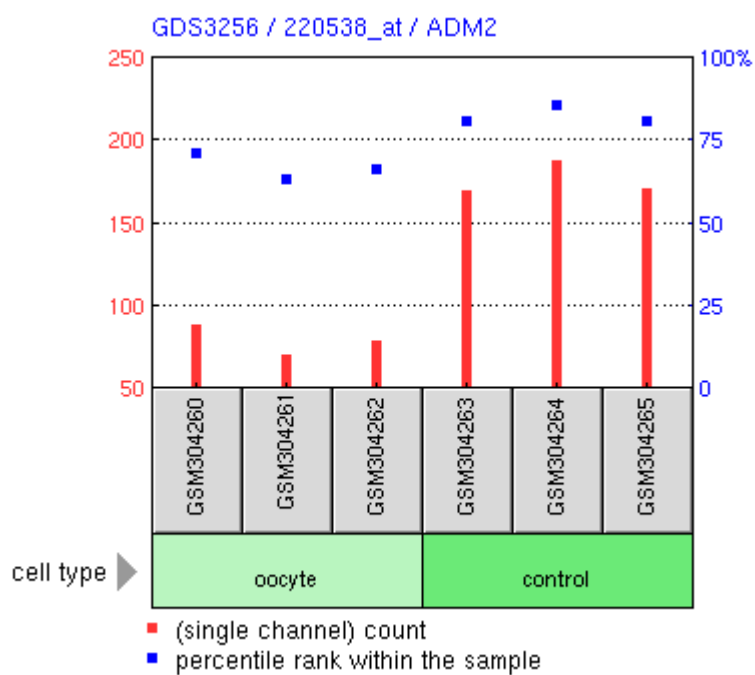

10. [GDS3422](#) | [GPL1261](#)

|                  |                                                                                                                                                                                                                                           |
|------------------|-------------------------------------------------------------------------------------------------------------------------------------------------------------------------------------------------------------------------------------------|
| Title:           | Activin deficiency effect on ovarian granulosa cells                                                                                                                                                                                      |
| GEO dataset link | <a href="http://www.ncbi.nlm.nih.gov/sites/GDSbrowser?acc=GDS3422">http://www.ncbi.nlm.nih.gov/sites/GDSbrowser?acc=GDS3422</a>                                                                                                           |
| Experiment:      | Analysis of granulosa cells from animals deficient for all ovarian activins. Granulosa cells are associated with the developing oocyte. Results provide insight into the role of activins in ovarian growth, differentiation, and cancer. |

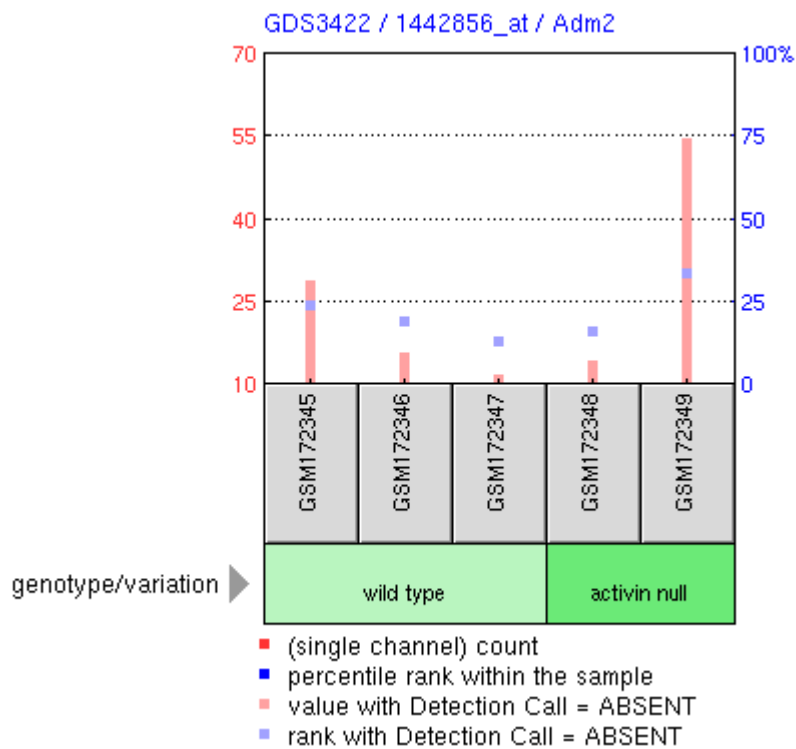

**Supplementary Fig. 2.** Video recording of COC culture in the control (A), IMD/ADM2 (100 ng/ml, B), and FSH (1 ng/ml, C) groups. The time lapsed recordings were taken in a 13 hr period starting at 20 hr after culture. These videos are related to Figure 3A.

A

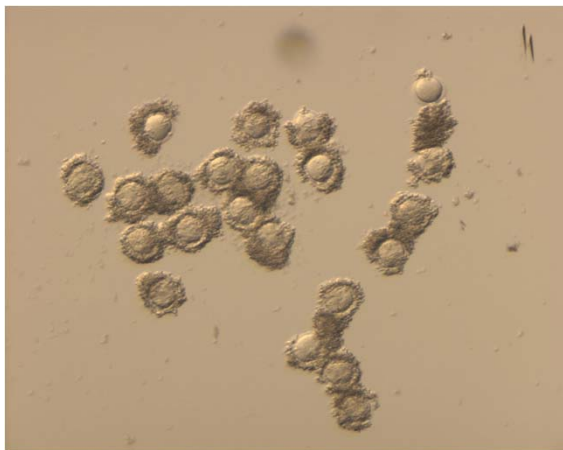

Control Video

B

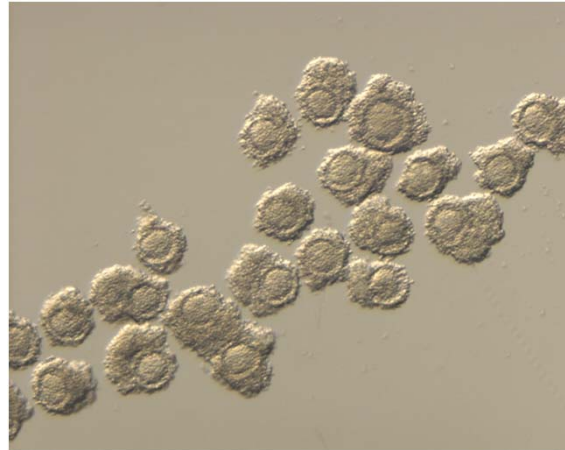

IMD Video

C

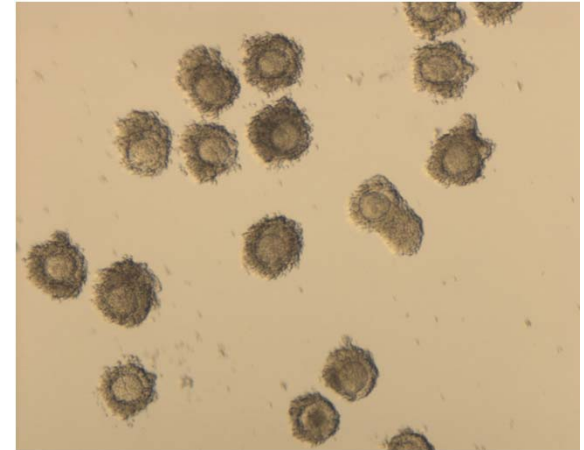

FSH Video
